# Supplementary material for: Usefulness of a Mobile Application (Mentali) for Anxiety and Depression Screening in Medical Students and Description of the Associated Triggering Factors
Source: MDPI journal article supplement (doi:10.3390/brainsci12091223), 2022-09-10
Supplement: s1 [file s1]

| Supplementary Table S1. Words of Alarm |                       |                                   |                           |                                |                                |                       |                           |
|----------------------------------------|-----------------------|-----------------------------------|---------------------------|--------------------------------|--------------------------------|-----------------------|---------------------------|
| Very High                              |                       | High                              |                           | Half                           |                                | Low                   |                           |
| Word in English                        | Word in Spanish       | Word in English                   | Word in Spanish           | Word in English                | Word in Spanish                | Word in English       | Word in Spanish           |
| Help                                   | Ayuda                 | Distressed                        | Angustiado                | Exhausted                      | Agotada                        | Agitated              | Agitado                   |
| Crisis                                 | Crisis                | Distressed                        | Angustiada                | Exhausted                      | Agotado                        | Agitated              | Agitada                   |
| Blow                                   | Explotar              | Anxiety                           | Ansiedad                  | Spoiled                        | Arruinado                      | Confused              | Confundida                |
| Fed up                                 | Harto                 | Anxious                           | Ansioso                   | Spoiled                        | Arruinada                      | Confused              | Confundido                |
| Fed up                                 | Harta                 | Anxious                           | Ansiosa                   | Spoil                          | Arruinar                       | Confused              | Confusión                 |
| Fed up                                 | Hartada               | Attack                            | Ataque                    | Tired                          | Cansado                        | Too much              | Demasiado                 |
| Fed up                                 | Hartado               | Blame                             | Culpa                     | Tired                          | Cansada                        | Doctor                | Doctor                    |
| Awful                                  | Horrible              | Guilt                             | Culpable                  | Weak                           | Débil                          | Doctor                | Doctora                   |
| Unstable                               | Inestable             | Discouragement                    | Desaliento                | Disappointment                 | Decepción                      | Studying              | Estudiando                |
| Try                                    | Intento               | Tired                             | Desganado                 | Upset                          | Decepcionada                   | Study                 | Estudio                   |
| Bad                                    | Mal                   | Pain                              | Dolor                     | Devils                         | Diablos                        | Homework              | Tarea                     |
| Terrible                               | Fatal                 | Hurts                             | Duele                     | Distracted                     | Distraído                      | Tense                 | Tenso                     |
| Cry                                    | Llorar                | Stress                            | Estrés                    | Distracted                     | Distraída                      | Terror                | Terror                    |
| Crying                                 | Llorando              | Stressed                          | Estresado                 | Sick                           | Enferma                        | Out of place          | Fuera de lugar            |
| Bad                                    | Malo                  | Stressed                          | Estresada                 | Sick                           | Enfermo                        | Until now I had time  | Hasta ahorita tuve tiempo |
| Hate                                   | Odio                  | Stressful                         | Estresante                | Tired                          | Fatigado                       | I will not reach      | No alcanzaré              |
| Worse                                  | Peor                  | I stressed                        | Estresé                   | Tired                          | Fatigada                       | I can not reach       | No alcanzar               |
| Whore                                  | Put                   | Encroach                          | Invadir                   | Frustration                    | Frustración                    | I don't pay attention | No pongo atención         |
| Whore                                  | Puto                  | Invade me                         | Invadirme                 | Impatient                      | Impaciente                     | I can't pay attention | No puedo poner atención   |
| Kill myself                            | Suicidarme            | Irritable                         | Irritable                 | Incomprehension                | Incomprensión                  | I can't decide        | No puedo decidirme        |
| Suicide                                | Suicidio              | Melancholic                       | Melancólico               | Insecure                       | Inseguro                       | I can't decide        | No puedo decidir          |
| Suicide                                | Suicidar              | Melancholic                       | Melancólica               | Insecure                       | Insegura                       |                       |                           |
| Fuck                                   | Verga                 | Nerves                            | Nervios                   | Unsafety                       | Inseguridad                    |                       |                           |
| Shit                                   | Mierda                | Nervous                           | Nerviosa                  | Fight                          | Pelea                          |                       |                           |
| Defeated                               | Vencido               | Nervous                           | Nervioso                  | Lose                           | Perder                         |                       |                           |
| Alone                                  | Solo                  | Nostalgia                         | Nostalgia                 | I missed                       | Perdí                          |                       |                           |
| I can't control myself                 | No me puedo controlar | Resigned                          | Resignado                 | Remorse                        | Remordimiento                  |                       |                           |
| I can't control it                     | No lo puedo controlar | Loneliness                        | Soledad                   | I failed a subject             | Reprobé                        |                       |                           |
| I am useless                           | No sirvo para nada    | Alone                             | Solo                      | Fail                           | Reprobar                       |                       |                           |
| Kill me                                | Matarme               | Sad                               | Triste                    | I will fail                    | Reprobaré                      |                       |                           |
| Die                                    | Morirme               | Sadness                           | Tristeza                  | Fear                           | Temor                          |                       |                           |
| I don't want to live                   | No quiero vivir       | :('                               | :('                       | Fear                           | Miedo                          |                       |                           |
| I don't wanna live                     | Sin ganas de vivir    | :c                                | :c                        | Mental block                   | Bloqueo mental                 |                       |                           |
| Abyss                                  | Abismo                | Low self-esteem                   | Baja autoestima           | Cost                           | Cuesta                         |                       |                           |
| I can't anymore                        | Ya no puedo más       | I don't like my appearance        | Mi aspecto no me gusta    | I fight                        | Peleo                          |                       |                           |
| I give up                              | Me doy por vencido    | I am worried                      | Preocupo                  | Less friends                   | Menos amigos                   |                       |                           |
|                                        |                       | Concern                           | Preocupación              | I did not sleep                | No dormí                       |                       |                           |
|                                        |                       | I am worried                      | Preocupan                 | I'm not doing nothing          | No hago nada                   |                       |                           |
|                                        |                       | It consumes                       | Consume                   | I haven't been able to sleep   | No he podido dormir            |                       |                           |
|                                        |                       | Worries                           | Preocupa                  | I can't concentrate            | No me concentro                |                       |                           |
|                                        |                       | I still feel the same             | Me sigo sintiendo igual   | I don't like being with people | No me gusta estar con la gente |                       |                           |
|                                        |                       | Nobody loves me                   | Nadie me quiere           | I can't sleep                  | No puedo dormir                |                       |                           |
|                                        |                       | I'm not done                      | No estoy hecho            | I don't want to do             | No quiero hacer                |                       |                           |
|                                        |                       | I'm not done                      | No estoy hecha            | I don't have money             | No tengo dinero                |                       |                           |
|                                        |                       | Tired                             | Sin ganas de nada         | Lose calm                      | Perder la calma                |                       |                           |
|                                        |                       | I don't like how I am             | No me gusta como soy      | Family problems                | Problemas familiares           |                       |                           |
|                                        |                       | I don't know who to tell          | No sé a quién decirle     | Low rating                     | Saldré bajo                    |                       |                           |
|                                        |                       | I do not have friends             | No tengo amigos           | No strength                    | Sin fuerza                     |                       |                           |
|                                        |                       | I'm not hungry                    | No tengo apetito          | Criticism                      | Crítica                        |                       |                           |
|                                        |                       | I don't feel like eating          | No tengo ganas de comer   |                                |                                |                       |                           |
|                                        |                       | I'm not hungry                    | No tengo hambre           |                                |                                |                       |                           |
|                                        |                       | I never have fun                  | Nunca me divierto         |                                |                                |                       |                           |
|                                        |                       | Nothing will ever work out for me | Nunca me saldrá algo bien |                                |                                |                       |                           |
|                                        |                       | I lose control                    | Pierdo el control         |                                |                                |                       |                           |
|                                        |                       | Without energy                    | Sin energía               |                                |                                |                       |                           |
|                                        |                       | Ugly                              | Feo                       |                                |                                |                       |                           |
|                                        |                       | I do everything wrong             | Todo lo hago mal          |                                |                                |                       |                           |
|                                        |                       | I don't know how to continue      | No sé cómo seguir         |                                |                                |                       |                           |
|                                        |                       | I don't know what to do           | No sé qué hacer           |                                |                                |                       |                           |

NOTE: Alarm words and digits catalogued by severity
