# Supplementary material for: Usefulness of a Mobile Application (Mentali) for Anxiety and Depression Screening in Medical Students and Description of the Associated Triggering Factors
Source: MDPI journal article supplement (doi:10.3390/brainsci12091223), 2022-09-10
Supplement: s1 [file s1]

Supplementary Table S2. Description of triggering factors associated with anxiety and/or depression by stage of life (n = 26).

| Aspect             | Stage of life, n (%)                   |           |                           |           |                          |           |
|--------------------|----------------------------------------|-----------|---------------------------|-----------|--------------------------|-----------|
|                    | INFANCY                                |           | CHILDHOOD                 |           | ADOLESCENCE              |           |
| Family             | Absent father                          | 3 (11.5)  | Domestic violence         | 3 (11.5)  | Family distancing        | 9 (34.6)  |
|                    | Dysfunctional family                   | 2 (7.6)   | Close family death        | 2 (7.6)   | Grandfather's death      | 3 (11.5)  |
|                    | They don't remember                    | 2 (7.6)   | Sibling separation        | 2 (7.6)   | Homosexual statement     | 1 (3.8)   |
|                    | Change of address                      | 2 (7.6)   | Sibling care              | 3 (11.5)  | Feelings of guilt        | 2 (7.6)   |
|                    | Complicated situations                 | 1 (3.8)   | Bullying                  | 1 (3.8)   | Rebellion                | 1 (3.8)   |
|                    | Unknown                                | 16 (61.5) | Change of house           | 2 (7.6)   | Father's illness         | 1 (3.8)   |
|                    |                                        |           | Stress                    | 2 (7.6)   | Kidnapping               | 1 (3.8)   |
|                    |                                        |           | Unknown                   | 11 (42.3) | Unknown                  | 8 (30.7)  |
| School             | Bullying                               | 1 (3.8)   | Bullying                  | 7 (26.9)  | Bullying                 | 4 (15.3)  |
|                    | They forgot to pick him up from school | 1 (3.8)   | He did not like it        | 1 (3.8)   | Low grades               | 4 (15.3)  |
|                    | Misbehavior                            | 1 (3.8)   | Internship                | 1 (3.8)   | Internship               | 1 (3.8)   |
|                    | Introvert                              | 1 (3.8)   | Unknown                   | 17 (65.3) | Behavior problems        | 2 (7.6)   |
|                    | Hard                                   | 2 (7.6)   |                           |           | Unknown                  | 15 (57.6) |
|                    | Unknown                                | 20 (76.9) |                           |           |                          |           |
| Friendship         | Few friends                            | 5 (19.2)  | Few friends               | 10 (38.4) | Few friends              | 3 (11.5)  |
|                    | Bullying                               | 1 (3.8)   | Unknown                   | 16 (61.5) | Difficulty socializing   | 2 (7.6)   |
|                    | Unknown                                | 20 (76.9) |                           |           | Feelings of loneliness   | 1 (3.8)   |
|                    |                                        |           |                           |           | Unknown                  | 20 (76.9) |
| Couples            | *                                      | —         | *                         | —         | Bad relationship         | 2 (7.6)   |
|                    |                                        |           |                           |           | Unknown                  | 24 (92.3) |
| Work               | *                                      | —         | *                         | —         | Work                     | 1 (3.8)   |
| Physical health    | Over weight                            | 2 (7.6)   | Overweight                | 4 (15.3)  | Bulimia and anorexia     | 2 (7.6)   |
|                    | Neonatal hypoxia                       | 2 (7.6)   | Accidents                 | 3 (11.5)  | Gastritis                | 2 (7.6)   |
|                    | Run over                               | 1 (3.8)   | Frequent hospitalizations | 1 (3.8)   | Irritable Bowel Syndrome | 1 (3.8)   |
|                    | Malnutrition                           | 1 (3.8)   | Appendectomy              | 1 (3.8)   | Migraine                 | 2 (7.6)   |
|                    | Asthma                                 | 1 (3.8)   | Anemia                    | 1 (3.8)   | Broken arm               | 1 (3.8)   |
|                    | Surgery                                | 1 (3.8)   | Vertigo                   | 1 (3.8)   | Cutting                  | 1 (3.8)   |
|                    | Allergy                                | 1 (3.8)   | Irritable Bowel Syndrome  | 1 (3.8)   | Eating disorders         | 1 (3.8)   |
|                    | Neck injury                            | 1 (3.8)   | Myopia                    | 1 (3.8)   | Unknown                  | 16 (61.5) |
|                    | Accident                               | 1 (3.8)   | Unknown                   | 13 (50)   |                          |           |
|                    | Unknown                                | 15 (57.6) |                           |           |                          |           |
| Personality traits | Introvert                              | 7 (26.9)  | Introvert                 | 9 (34.6)  | Introvert                | 8 (30.7)  |
|                    | Outgoing                               | 1 (3.8)   | Outgoing                  | 2 (7.6)   | Glad                     | 2 (7.6)   |
|                    | Calm                                   | 2 (7.6)   | Irritable                 | 1 (3.8)   | Obsessive                | 2 (7.6)   |
|                    | Restless                               | 2 (7.6)   | Obsessive                 | 1 (3.8)   | Antisocial               | 1 (3.8)   |
|                    | Skilled                                | 1 (3.8)   | Cheerful                  | 1 (3.8)   | Unknown                  | 13 (50)   |
|                    | Easy crying                            | 1 (3.8)   | Unknown                   | 12 (46.1) |                          |           |
|                    | Unknown                                | 12 (46.1) |                           |           |                          |           |
|                    |                                        |           |                           |           |                          |           |

\* The features does not apply. Unknown: Participants who did not complete the section and therefore the information was not available.
